# Supplementary material
Source: PubMed Central journal article supplement (PMC4793652)
Supplement: pate018638.ww1_default.pdf [file pate018638.ww1_default.pdf]

# Comparative safety of anesthetic technique for hip fracture surgery in adults

## APPENDIX

**Table A1.** Selected baseline characteristics of patients with and without conclusive information on anesthesia type. Values are numbers (percentages) unless stated otherwise

|                                                    | <b>General anesthesia</b><br>N = 61,554 | <b>Regional anesthesia</b><br>N = 6,939 | <b>General and regional anesthesia</b><br>N = 4,791 | <b>No conclusive information on anesthesia</b><br>N = 32,149 |
|----------------------------------------------------|-----------------------------------------|-----------------------------------------|-----------------------------------------------------|--------------------------------------------------------------|
| <b>Personal characteristics</b>                    |                                         |                                         |                                                     |                                                              |
| Age, median (IQR)                                  | 82 (74, 88)                             | 83 (77, 88)                             | 83 (76, 88)                                         | 83 (75, 88)                                                  |
| 18-54 years                                        | 2235 (3.6)                              | 99 (1.4)                                | 88 (1.8)                                            | 961 (3.0)                                                    |
| 55-69 years                                        | 8224 (13.4)                             | 681 (9.8)                               | 531 (11.1)                                          | 3920 (12.2)                                                  |
| 70-79 years                                        | 13941 (22.6)                            | 1581 (22.8)                             | 1107 (23.1)                                         | 7116 (22.1)                                                  |
| 80-84 years                                        | 12830 (20.8)                            | 1540 (22.2)                             | 1026 (21.4)                                         | 7018 (21.8)                                                  |
| ≥85 years                                          | 24324 (39.5)                            | 3038 (43.8)                             | 2039 (42.6)                                         | 13134 (40.9)                                                 |
| Female sex                                         | 43527 (70.7)                            | 5063 (73.0)                             | 3429 (71.6)                                         | 22972 (71.5)                                                 |
| Ethnicity:                                         |                                         |                                         |                                                     |                                                              |
| White                                              | 48768 (79.2)                            | 5068 (73.0)                             | 4084 (85.2)                                         | 22652 (70.5)                                                 |
| Black                                              | 2949 (4.8)                              | 211 (3.0)                               | 247 (5.2)                                           | 812 (2.5)                                                    |
| Hispanic                                           | 1938 (3.1)                              | 594 (8.6)                               | 39 (0.8)                                            | 591 (1.8)                                                    |
| Other or unknown                                   | 7899 (12.8)                             | 1066 (15.4)                             | 421 (8.8)                                           | 8094 (25.2)                                                  |
| <b>Hospitalization and surgery characteristics</b> |                                         |                                         |                                                     |                                                              |
| Type of admission:                                 |                                         |                                         |                                                     |                                                              |
| Emergency room                                     | 34852 (56.6)                            | 4322 (62.3)                             | 2676 (55.9)                                         | 18848 (58.6)                                                 |
| Non-healthcare facility                            | 18554 (30.1)                            | 1817 (26.2)                             | 1342 (28.0)                                         | 9005 (28.0)                                                  |
| Other                                              | 8148 (13.3)                             | 800 (11.5)                              | 773 (16.1)                                          | 4296 (13.4)                                                  |
| Calendar year                                      |                                         |                                         |                                                     |                                                              |
| 2007                                               | 3805 (6.2)                              | 536 (7.7)                               | 267 (5.6)                                           | 2335 (7.3)                                                   |
| 2008                                               | 14364 (23.3)                            | 1865 (26.9)                             | 1227 (25.6)                                         | 8125 (25.3)                                                  |
| 2009                                               | 15204 (24.7)                            | 1650 (23.8)                             | 1306 (27.3)                                         | 8061 (25.1)                                                  |
| 2010                                               | 16117 (26.2)                            | 1693 (24.4)                             | 1188 (24.8)                                         | 7758 (24.1)                                                  |
| 2011                                               | 12064 (19.6)                            | 1195 (17.2)                             | 803 (16.8)                                          | 5870 (18.3)                                                  |
| Length of stay, median (IQR)                       | 6 (5, 8)                                | 6 (5, 8)                                | 6 (5, 8)                                            | 6 (5, 8)                                                     |
| Days before surgery, median (IQR)                  | 1 (1, 2)                                | 1 (1, 2)                                | 1 (1, 2)                                            | 1 (1, 2)                                                     |
| Type of surgical procedure:                        |                                         |                                         |                                                     |                                                              |
| Closed reduction of fracture                       | 14359 (23.3)                            | 1483 (21.4)                             | 1047 (21.9)                                         | 6655 (20.7)                                                  |
| Open reduction of fracture                         | 21541 (35.0)                            | 2398 (34.6)                             | 1470 (30.7)                                         | 12394 (38.6)                                                 |
| Total hip replacement                              | 2622 (4.3)                              | 297 (4.3)                               | 232 (4.8)                                           | 1478 (4.6)                                                   |
| Partial hip replacement                            | 23252 (37.8)                            | 2790 (40.2)                             | 2067 (43.1)                                         | 11733 (36.5)                                                 |

|                                                           |              |             |             |              |
|-----------------------------------------------------------|--------------|-------------|-------------|--------------|
| Other hip procedure                                       | 3598 (5.9)   | 362 (5.2)   | 336 (7.0)   | 2277 (7.1)   |
| <b>Comorbidities</b>                                      |              |             |             |              |
| Type of fracture:                                         |              |             |             |              |
| Transcervical fracture                                    | 15951 (25.9) | 1974 (28.4) | 1332 (27.8) | 8424 (26.2)  |
| Intertrochanteric fracture                                | 26874 (43.7) | 2988 (43.1) | 1941 (40.5) | 13625 (42.4) |
| Subtrochanteric fracture                                  | 3831 (6.2)   | 365 (5.3)   | 243 (5.1)   | 2026 (6.3)   |
| Trochanteric fracture                                     | 1299 (2.1)   | 152 (2.2)   | 106 (2.2)   | 715 (2.2)    |
| Unspecified part of neck of femur                         | 23754 (38.6) | 2680 (38.6) | 1978 (41.3) | 13178 (41.0) |
| Pathologic fracture of neck of femur                      | 1813 (2.9)   | 168 (2.4)   | 111 (2.3)   | 815 (2.5)    |
| Charlson comorbidity score, median (IQR)                  | 1 (0, 2)     | 1 (0, 2)    | 1 (0, 2)    | 1 (0, 2)     |
| <b>Inpatient use of drugs and services before surgery</b> |              |             |             |              |
| Angiotensin converting enzyme inhibitor                   | 8937 (14.5)  | 933 (13.4)  | 673 (14.0)  | 4309 (13.4)  |
| $\beta$ -blocker                                          | 21362 (34.7) | 2258 (32.5) | 1582 (33.0) | 10635 (33.1) |
| Anti-diabetic drugs                                       | 9043 (14.7)  | 919 (13.2)  | 664 (13.9)  | 3969 (12.3)  |
| Aspirin                                                   | 4166 (6.8)   | 393 (5.7)   | 355 (7.4)   | 2210 (6.9)   |
| Intravenous heparin                                       | 900 (1.5)    | 81 (1.2)    | 61 (1.3)    | 506 (1.6)    |
| Intensive care unit admission                             | 4767 (7.7)   | 432 (6.2)   | 259 (5.4)   | 1727 (5.4)   |
| Packed red blood cells transfusion:                       |              |             |             |              |
| 0 unit                                                    | 55024 (89.4) | 6393 (92.1) | 4290 (89.5) | 28667 (89.2) |
| 1 unit                                                    | 2010 (3.3)   | 202 (2.9)   | 139 (2.9)   | 1197 (3.7)   |
| $\geq 2$ units                                            | 4520 (7.3)   | 344 (5.0)   | 362 (7.6)   | 2285 (7.1)   |
| <b>Hospital characteristics</b>                           |              |             |             |              |
| Teaching hospital                                         | 22114 (35.9) | 1318 (19.0) | 1273 (26.6) | 11195 (34.8) |
| Urban hospital                                            | 54790 (89.0) | 5805 (83.7) | 3650 (76.2) | 27849 (86.6) |
| Hip fracture surgery volume                               |              |             |             |              |
| High volume                                               | 38278 (62.2) | 4028 (58.0) | 2741 (57.2) | 22353 (69.5) |
| Medium volume                                             | 18369 (29.8) | 1915 (27.6) | 1710 (35.7) | 7474 (23.2)  |
| Low volume                                                | 4907 (8.0)   | 996 (14.4)  | 340 (7.1)   | 2322 (7.2)   |

**Table A2.** Number of events and risk of inhospital mortality in patients with and without conclusive information on anesthesia type

|                                            | <b>General anesthesia</b> | <b>Regional anesthesia</b> | <b>General and regional anesthesia</b> | <b>No conclusive information on anesthesia</b> |
|--------------------------------------------|---------------------------|----------------------------|----------------------------------------|------------------------------------------------|
| N patients                                 | 61,554                    | 6,939                      | 4,791                                  | 32,149                                         |
| N in-hospital deaths                       | 1,362                     | 144                        | 115                                    | 740                                            |
| Risk of in-hospital death %                | 2.2                       | 2.1                        | 2.4                                    | 2.3                                            |
| Unadjusted analysis<br>Risk ratio (95% CI) | Ref.                      | 0.94 (0.79 to 1.11)        | 1.09 (0.90 to 1.32)                    | 1.04 (0.95 to 1.14)                            |
